# Supplementary material
Source: publisher site journal article supplement (https://thieme-connect.com/media/10.1055-s-00035024/201101/supmat/10-1160-th11-01-0022-supp.pdf)
Supplement: Supplementary file 1 [file 10-1160-th11-01-0022-supp.pdf]

**Supplementary figure to Schäfer et al. “Early determination of clopidogrel responsiveness by platelet reactivity index identifies patients at risk for cardiovascular events after myocardial infarction” (Thromb Haemost 2011; 106.1)**

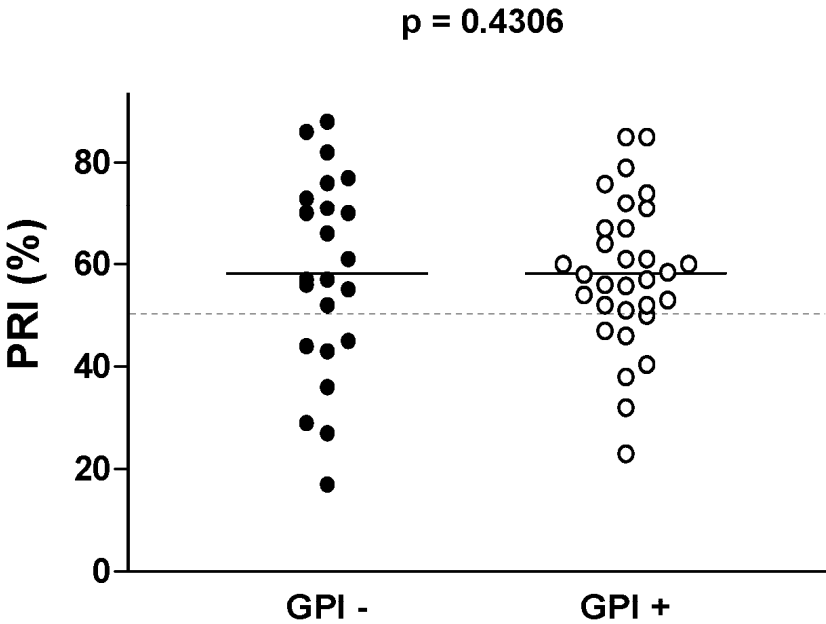

Suppl. Fig. 1

**Suppl. Figure 1: Influence of glycoprotein IIb/IIIa treatment on ADP-induced platelet signalling in clopidogrel-treated patients with ST elevation myocardial infarction:** P2Y<sub>12</sub> receptor inhibition was determined by ADP-mediated inhibition of PGE<sub>1</sub>-induced VASP phosphorylation expressed as the platelet-reactivity index (PRI) in patients either initially treated with (GP+) or without (GP-) a glycoprotein IIb/IIIa inhibitor. Horizontal lines indicate the respective median, P-value is given for Mann-Whitney U test.
